RESEARCH ARTICLE

# Suppression of *Aedes aegypti* by the sterile insect technique on Captiva Island, Florida, USA from 2020 to 2022

Rachel Morreale<sup>1</sup>\*, Danilo O. Carvalho<sup>2,3</sup>, Steven Stenhouse<sup>1</sup>, Johanna Bajonero<sup>1</sup>, Rui Pereira<sup>2</sup>, Daniel A. Hahn<sup>3</sup>, Aaron Lloyd<sup>1</sup>, David F. Hoel<sup>1</sup>

**1** Lee County Mosquito Control District, Lehigh Acres, Florida, United States of America, **2** Insect Pest Control Section, Joint FAO/IAEA Centre of Nuclear Techniques in Food and Agriculture, Department of Nuclear Sciences and Applications, International Atomic Energy Agency, Vienna, Austria, **3** Department of Entomology & Nematology, University of Florida, Gainesville, Florida, United States of America

\* These authors contributed equally to this work.

\* [morreale@lcmcd.org](mailto:morreale@lcmcd.org)

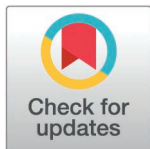

## OPEN ACCESS

**Citation:** Morreale R, Carvalho DO, Stenhouse S, Bajonero J, Pereira R, Hahn DA, et al. (2025) Suppression of *Aedes aegypti* by the sterile insect technique on Captiva Island, Florida, USA from 2020 to 2022. PLoS Negl Trop Dis 19(7): e0013256. <https://doi.org/10.1371/journal.pntd.0013256>

**Editor:** Gordana Rasic, QIMR: QIMR Berghofer Medical Research Institute, AUSTRALIA

**Received:** October 29, 2024

**Accepted:** June 17, 2025

**Published:** July 11, 2025

**Copyright:** © 2025 Morreale et al. This is an open access article distributed under the terms of the [Creative Commons Attribution License](https://creativecommons.org/licenses/by/4.0/), which permits unrestricted use, distribution, and reproduction in any medium, provided the original author and source are credited.

**Data availability statement:** All data are in the manuscript and/or supporting information files.

**Funding:** This study was partially supported by a CDC-FDOH Hurricane Co-Agreement grant (CODRF to DFH). Support was also provided by the Insect Pest Control Section of the Joint

## Abstract

*Aedes aegypti*, an aggressive nuisance biter and the primary vector for numerous arboviruses, such as chikungunya, dengue, and Zika, presents significant control challenges due to its ability to thrive in urban environments, escapes insecticide treatment by using cryptic resting and oviposition sites, and development of resistance to chemical mosquito control products being used routinely. From 2020 to 2022, the Lee County Mosquito Control District (LCMCD) employed the Sterile Insect Technique (SIT) to test a new approach in its integrated mosquito management toolbox, targeting the population suppression of *Ae. aegypti* on Captiva Island, Florida. Over 24.1 million sterile males were released across three phases, covering up to 142 hectares. The study demonstrated a population reduction of up to 79% in wild adults and a 59% decline in egg densities in the primary intervention area. While population control was successful, an influx of wild females from untreated zones posed ongoing challenges to complete suppression in areas close to non-intervention areas. This supported a need for an area-wide integrated pest management (AW-IPM) approach. These results underscore SIT's potential as a critical tool in integrated mosquito management strategies and emphasize practical application.

## Author summary

*Aedes aegypti* is a major nuisance mosquito in many warm places across the world. This species is particularly significant for vector control programs because it has high capacity to transmit viruses that can cause human disease including dengue virus, Zika virus, and chikungunya virus. Traditional chemical control treatments are not always effective for *Ae. aegypti*, because larvae

FAO/IAEA Centre of Nuclear Techniques in Food and Agriculture and the United States State Department ("Surge Expansion of the Sterile Insect Technique (SIT) to Control Mosquito Populations that Transmit the Zika Virus" to DOC and RP). Support was provided as well by the Florida Department of Health CDC-FDOH Hurricane Co-Agreement grant (CODRE to DAH); Florida Department of Agriculture and Consumer Services (Projects 25367 and 20220 to DAH); National Institute of Food and Agriculture, US Department of Agriculture, Hatch project (FLA-ENY-005943 to DAH); and the joint FAO/IAEA CRP ("Mosquito Irradiation, Sterilization, and Quality Control" to DAH). The funders had no role in study design, data collection and analysis, decision to publish, or preparation of the manuscript.

**Competing interests:** The authors have declared that no competing interests exist.

breed in dispersed sites, their adults rest in cryptic locations, and insecticide resistance has evolved in some populations. Thus, additional control tools are needed for this species. Here we show that the sterile insect technique (SIT), a long-standing tool in agricultural pest management, can be effectively used to suppress a nuisance population of *Ae. aegypti* on Captiva Island in Florida, USA. Specifically, we released just over 24 million sterile, lab-reared males between June 2020 to September 2022 and show that the number of wild females was substantially reduced in our intervention site compared to both the same site before intervention and non-intervention sites. Our work demonstrates that SIT should be considered for use as part of the toolbox for the integrative management of mosquito pests.

## Introduction

*Aedes aegypti* is a significant invasive mosquito species in warm climates across the globe because it is an aggressive biter that lives in and near human dwellings. This species can breed in a wide variety of artificial habitats and survive across a wide range of temperatures [1,2]. *Aedes aegypti* predominantly feeds on humans to complete its life cycle, and this mosquito possesses excellent vector competence and high vectorial capacity for several arboviruses, including dengue and Zika virus, among others [3,4]. *Aedes aegypti* is highly anthropophilic and is closely associated with human populations, with a strong preference for biting humans [5,6]. This close association with humans has played a vital role in the global dispersion of *Ae. aegypti*. Originating in sub-Saharan Africa and the southwestern Indian Ocean [7], this mosquito species spread overseas during European transatlantic trade (1500–1700), including to the American continent [8]. Historical records and descriptions of *Aedes*-borne diseases, such as yellow fever, allow us to trace the presence of the vector back in time. The first recorded instance of yellow fever in the Americas occurred in Hispaniola (present-day Dominican Republic and Haiti) in 1495, followed by a case in 1635 on Guadeloupe Island, indicating *Ae. aegypti* has long been a problem in the Caribbean [9].

Yellow fever transmission in the United States has been frequently documented since the late 1600s, with multiple seasonal epidemics in colder climate port cities like Philadelphia and Boston throughout the late 1700s and 1800s [10,11]. With the frequent transmission of yellow fever and the introduction of encephalitis over a hundred years ago, the State of Florida began a public health campaign to combat mosquito-borne disease, leading cities and counties throughout the state to form various local government organizations focused on mosquito control. The Lee County Mosquito Control District (LCMCD) was established in 1958 by merging several existing mosquito control districts from Fort Myers, Boca Grande, and Sanibel-Captiva [12]. The primary directives of LCMCD are to protect residents and visitors of Lee County, Florida, from mosquito-borne disease and nuisance biting that may detract from the enjoyment of outdoor spaces. While the incidence of mosquito-borne

disease is low, Florida is a major travel destination for visitors from regions where arboviruses and malaria are highly prevalent. Each year since 2011, Florida has experienced a low incidence of local dengue transmission, primarily associated with travelers from areas where the disease is endemic [13–15]. Similarly, Florida also experienced a transient outbreak of Zika with local transmission in 2016–2017 [16,17] and recently even experienced a small local cluster of malaria transmission associated with initial travel-acquired cases [18–20]. Given the high volume of international travelers visiting Florida, a sub-tropical climate, and multiple mosquito species capable of vector disease-causing agents, Florida's mosquito control districts must be vigilant and have control strategies ready to deploy against disease-vectoring species.

The LCMCD has been employing insecticides for mosquito control since the late 1950s. Initially, the district relied heavily on DDT, a potent and long-lasting insecticide, until its environmental and health risks and mosquito resistance became well-known in the 1960s. Since then, the district has adopted various other insecticides, including malathion, naled, pyrethroids, and *Bacillus thuringiensis israelensis* (Bti), a bacterial larvicide [12]. These insecticides are applied using multiple methods, such as aerial spraying, truck-mounted spraying, and targeted applications with backpack sprayers. The district's use of insecticides has effectively reduced mosquito populations and decreased the risk of transmission of mosquito-borne diseases. However, concerns persist regarding these chemicals' potential environmental and human health impacts. Furthermore, resistance to commonly used larvicides and adulticides has been detected at high levels in populations of *Ae. aegypti* worldwide, including in Florida [21–23].

Given the problems associated with insecticide application and resistance development, it is crucial to explore alternative control methods. One such method currently under development is the Sterile Insect Technique (SIT) for mosquitoes, which has shown promising results based on trials in multiple countries [24–27]. The SIT involves rearing massive numbers of insect males in the mass-rearing facilities laboratory, sterilizing them, and then releasing the sterile males into the field at greater densities than wild males to increase the likelihood of females mating with sterile males rather than fertile (wild) males. With frequent and consistent releases over generations, the wild population is eventually suppressed [28].

Since 2017, in collaboration with the Insect Pest Control Subprogramme (a joint partnership between the International Atomic Energy Agency – IAEA – and the Food and Agriculture Organization – FAO), LCMCD has been developing SIT for mosquitoes. The district established baseline data collection and performed substantial public engagement on the offshore islands Captiva and Sanibel [29]. This helped define the descriptive mosquito population profile and promote acceptance of the novel intervention (publication under preparation). This is a historic place for SIT because Sanibel was where the first SIT applications against an insect pest were employed, targeting the New World Screwworm *Cochliomyia hominivorax* in the early 1950s [30,31]. To demonstrate successful SIT for *Ae. aegypti* in these historic locations, LCMCD has also performed dispersal studies and wild population estimation using the mark-release-recapture method on Captiva Island [32]. This paper focuses on the next step, demonstrating mosquito population suppression by continuously releasing sterile males and monitoring the wild population and the sterile males released [33,34]. We show that continuous releases of massive numbers of lab-reared sterile male *Ae. aegypti* can successfully suppress the wild *Ae. aegypti* population on Captiva, with suppression sustained over three years.

## Results

Because of Captiva's large, linearly arrayed land mass and initial development of sterile male production, our release strategy was planned to start with a defined area at the island's northern tip and increase the coverage in sequential sections over time. In this approach, we expanded the coverage area to encompass progressively more of Captiva Island as our capacity to rear more sterile males increased over time, which followed the suggestions of the phased conditional approach targeting full operational SIT implementation described previously in 2020 [34]. Similar strategies have been successfully applied for SIT programs and pilot trials for other insects [26]. Captiva Island had an intervention period from 10 June 2020 until 30 September 2022 that was divided into three phases (Fig 1D), according to the rearing capacity and expansion of the area of our releases. Efficacy of our intervention was monitored by adult surveillance across an array of

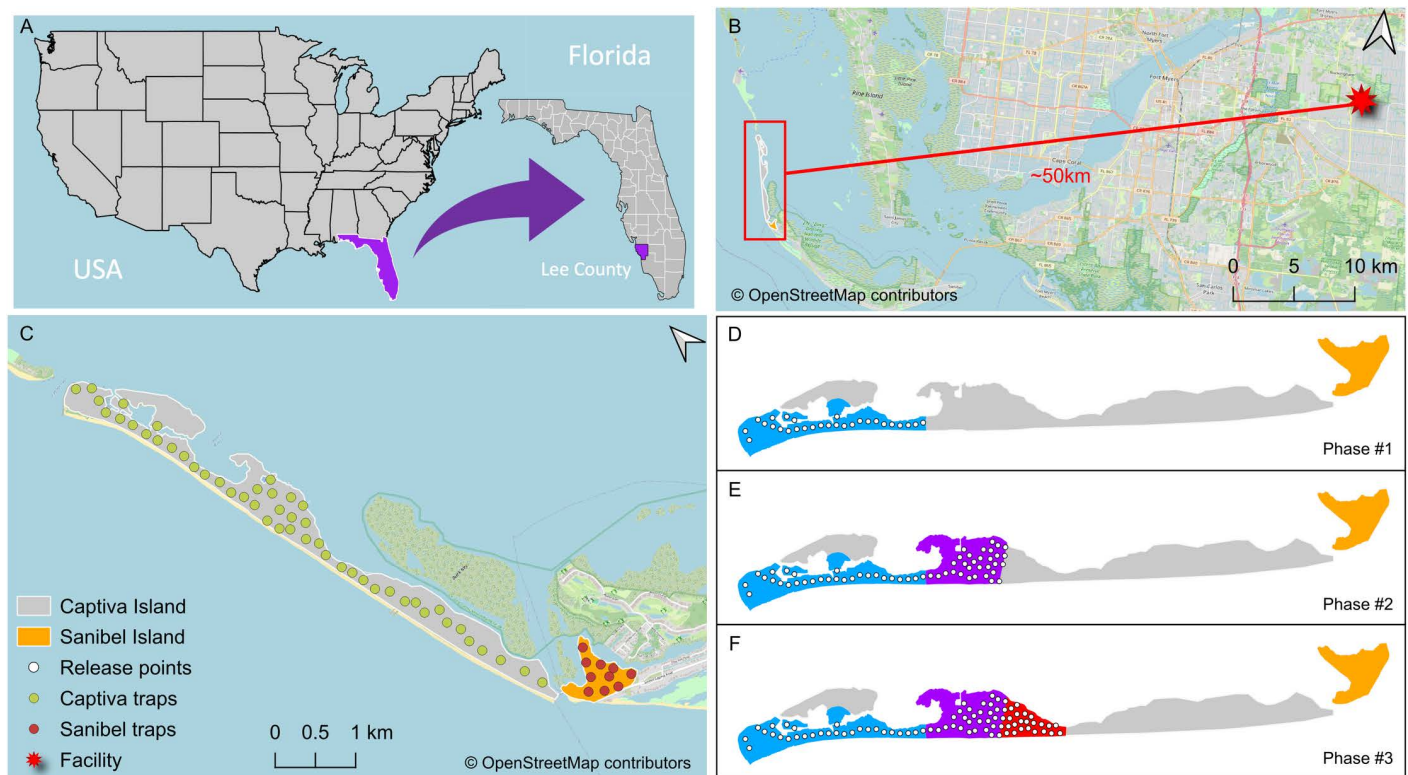

**Fig 1. SIT study area.** (A) Lee County, FL – USA. (B) The straight-line distance from the rearing facility at LCMCD and Captiva Island is around 50 km. (C) The study area on the northwestern tip of Sanibel is a non-intervention area with trapping stations, and the intervention area in Captiva has trapping stations. Trap stations (green and brown circles) comprise one ovitrap and one BGS in both intervention and non-intervention areas. The intervention area was split into three release phases (D–F), showing the respective release points and how our release area grew throughout the study as our capacity to rear more sterile males increases. Maps were created using QGIS version 3.16.9 Hannover, with a background map sourced from OpenStreetMap (Creative Commons Attribution-ShareAlike 2.0 license).

<https://doi.org/10.1371/journal.pntd.0013256.g001>

48 BG-Sentinel 2 traps (BGS, Biogents, Regensburg, Germany) that were collected twice a week, and a matched array of oviposition cups that were checked once a week (see Methods for more details).

### Suppression of the wild *Aedes aegypti* population on Captiva

More than 24.1 million sterile-marked males were released in the intervention area between June 10, 2020, and September 22, 2022, a period that was divided into three phases (Phases #1, #2, and #3), as shown in Fig 1D–1F. From the released males, 10,587 marked males were recaptured, representing a total recapture around 0.02%. Releases usually occurred on Tuesdays and Fridays, according to the release schedule of the sterile-marked males. As our capacity for rearing increased, we gradually expanded the area for releasing sterile males. Table 1 illustrates the growth in our releases, highlighting the rising average number of sterile-marked males released over time, along with the expansion of the release area in each new phase.

Phase #1 lasted 120 weeks with the release of sterile-marked males in our initial 63 ha release zone at the northern tip of Captiva (Phase #1). The number of wild adults captured and the number of eggs laid declined noticeably within a few weeks of our release, starting in June 2020 (Fig 2). Both wild adults captured and the number of eggs per trap remained noticeably lower than in prior years at the same site or in our non-intervention site on nearby Sanibel Island throughout our releases in 2021 and 2022 (Fig 2). The number of eggs/trap (Fig 2A) was significantly lower in our Phase #1



**Table 1. Number of female (♀) and male (♂) *Aedes aegypti* adults and total number of field retrievals (#) from BG-Sentinel traps (deployed for both wild and sterile male mosquito surveillance) and total number of eggs collected from ovitraps, in Captiva and Sanibel Islands, from 2020 to 2022. Traps were deployed in three phases on Captiva (labelled #1 to #3) and continuously on Sanibel. Values represent the total number of individuals or eggs collected per year. Dashes represent time points that did not exist. Before 2020, the data were considered baseline and were included in a separate publication [29].**

| Activity                  |            | Area/ Phase |      | 2020      |      |      | 2021       |      |      | 2022       |     |      |
|---------------------------|------------|-------------|------|-----------|------|------|------------|------|------|------------|-----|------|
|                           |            |             |      | ♀         | ♂    | #    | ♀          | ♂    | #    | ♀          | ♂   | #    |
| BG-Sentinel Wild          | Captiva    | #1          | 1515 | 779       | 780  | 18   | 6          | 560  | —    | —          | —   |      |
|                           |            | #2          | —    | —         | —    | 893  | 440        | 406  | —    | —          | —   |      |
|                           |            | #3          | —    | —         | —    | 7    | 0          | 26   | 2244 | 1473       | 910 |      |
|                           | Sanibel    |             | 6688 | 4256      | 1020 | 7751 | 5843       | 1000 | 3275 | 1930       | 700 |      |
| BG-Sentinel Sterile males | Captiva    | #1          | 10   | 1322      | 780  | 16   | 1955       | 560  | —    | —          | —   |      |
|                           |            | #2          | —    | —         | —    | 1    | 1327       | 406  | —    | —          | —   |      |
|                           |            | #3          | —    | —         | —    | 0    | 0          | 26   | 8    | 5834       | 910 |      |
|                           | Sanibel    |             | 0    | 0         | 1020 | 0    | 8          | 1000 | 0    | 12         | 700 |      |
| Ovitrap                   | Total eggs | Captiva     | #1   | 534       |      | 318  | 216        |      | 1030 | 60         |     | 1635 |
|                           |            |             | #2   | —         |      | —    | 3624       |      | 1036 | 1652       |     | 2175 |
|                           |            |             | #3   | —         |      | —    | 0          |      | 91   | 6095       |     | 3585 |
|                           |            | Sanibel     |      | 4260      |      | 779  | 4391       |      | 1747 | 11919      |     | 2697 |
| Sterile male release      |            | Captiva     |      | 3 096 060 |      |      | 10 675 818 |      |      | 10 352 661 |     |      |

<https://doi.org/10.1371/journal.pntd.0013256.t001>

intervention area on Captiva Island compared to the non-intervention area on Sanibel Island. This effect was particularly apparent during the high-rain season when mosquito abundances were higher than the low-rain season (GLM: Site (Intervention vs. Non-Intervention) z value: -37.22,  $\beta$  = -2.01, and  $p < 0.001$ , Month of Suppression Trial z value: -5.21,  $\beta$  = -0.01, and  $p < 0.001$ , [S1A Fig](#)). Of note, the percentage of eggs hatching in our Phase #1 intervention area was on average 48% lower than in our non-intervention area, but this difference was not statistically significant ([Fig 2B](#), GLM z value: -1.268,  $\beta$  = -0.65, AND  $p = 0.205$ ). Perhaps most importantly, from a mosquito control perspective, our sterile male releases effectively suppressed the wild *Ae. aegypti* adult population ([Fig 2C](#)). When we normalized the number of wild *Ae. aegypti* captured against the number of days that BG sentinel traps were deployed in the field, defined as adult/trap/day (ATD) there were clearly fewer wild mosquitoes in our intervention zone than the non-intervention zone (GLM: Site (Intervention vs. Non-Intervention) z value: -559.6,  $\beta$  = -1.87, and  $p < 0.001$ , Month of Suppression Trial z value: -716.9,  $\beta$  = -0.058, and  $p < 0.001$ , Site x Month z value: -298.4, -0.081,  $p < 0.001$ , [S1B Fig](#)). Noting the significant interaction between site and month in our model, there was also a strong effect of seasonality, with suppression of adult numbers being most apparent in the rainy season when mosquito populations are high and less apparent in the dry season when populations are naturally low ([Figs 2 and S1B](#)).

To further test for suppression, we employed a causal impact analysis for time-series data that explicitly considers temporal autocorrelation [35]. We used adult trap captures and egg collections from the Phase #1 traps collected in the three years before releases beginning in June 2020 [29] to project a distribution of expected adult trap captures and egg collections based on these high-resolution historical data and then used the Bayesian estimation method to calculate the probability that our monitoring data after release is different from the expected population based on historical monitoring at the exact location [35,36]. We show that within weeks of our releases starting, there was a significant decrease in both the numbers of eggs captured in ovitraps and the numbers of wild adults captured in BGS traps and that the impact of releases was continued over the multiple seasons of releases ([S2 Fig](#)). The number of eggs in our ovitraps was reduced by 59% (42–70% credible interval for reduction), and the effect of the intervention on eggs was -3.58 (-1.65 to -5.35 credible interval). Given these parameters for the egg population reduction, the probability of obtaining this effect by chance

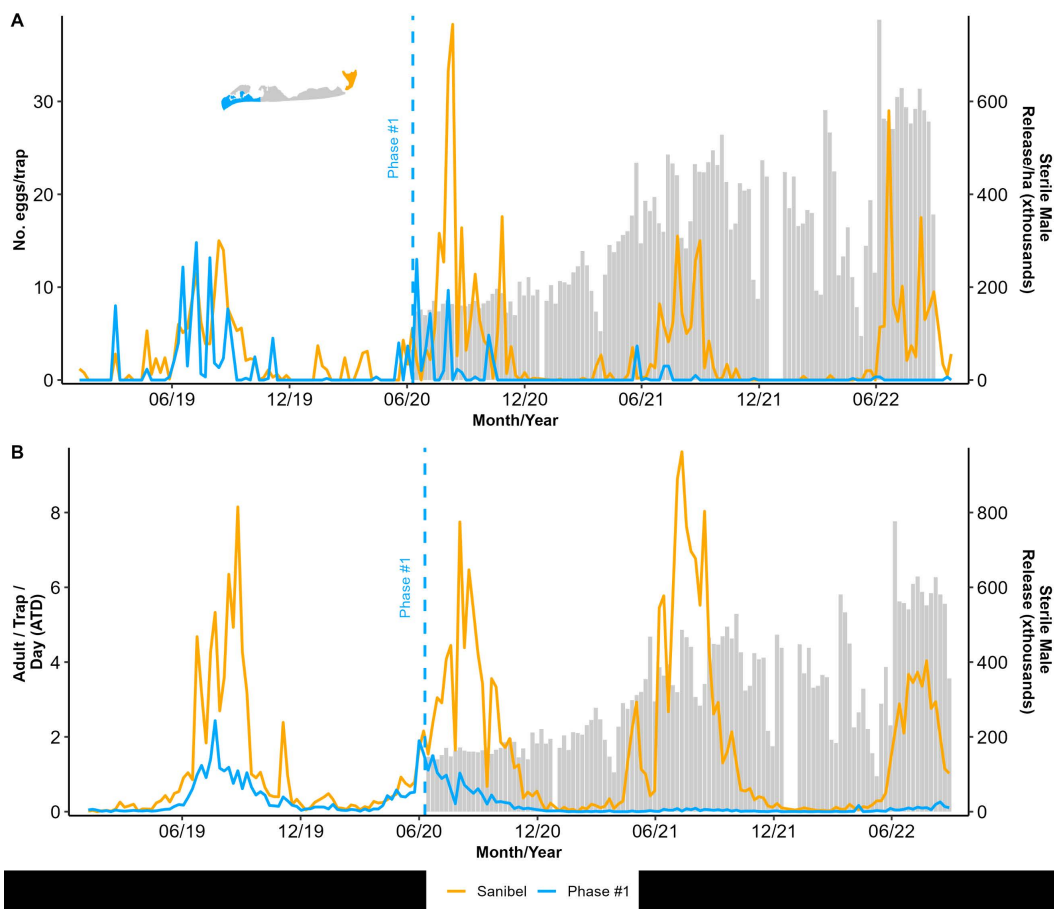

**Fig 2.** Captiva and Sanibel Islands sterile insect technique pilot (SIT) project field collection data showing the mean number of *Aedes aegypti* sterile marked males released per hectare twice a week (grey bars) and (A) the mean number of collected eggs during Phase #1 in Captiva and the non-intervention area in Sanibel Island, (B) the proportion of the collected eggs that hatched, and (C) the number of adults (males and females) found per trap per day (ATD). The dashed line indicates the timing of the start of the Phase #1 releases.

<https://doi.org/10.1371/journal.pntd.0013256.g002>

alone is minimal (Bayesian probability,  $p=0.001$ ). Similarly, the number of adults in our BGS traps was reduced by -79% (-69 to -85% credible interval for reduction), and the effect of the intervention on the adult population was -0.53 (-0.30 to -0.77 credible interval, Bayesian probability,  $p=0.001$ ).

On 22 May 22, 2021, we expanded the area of intervention from the initial 63 ha of the Phase #1 area to add 54.7 ha of Phase #2 for a total of 117.7 ha intervention area with the release of sterile males over 71 weeks until the study ended (Fig 1). The expansion area for Phase #2 included the most populated area of the island. In this area, we had previously performed mark-release recapture studies [32]. Although the effects of sterile male releases on the number of eggs collected in ovitraps in Phase #2 was not as apparent as in Phase #1, there was a significant decrease in the number of eggs/trap in our Phase #2 intervention area compared to our non-intervention area (GLM: Site (Intervention vs. Non-Intervention)  $z$  value: -28.58,  $\beta=-0.83$ , and  $p<0.001$ , S1C Fig). We determined hatching from the eggs collected in Phase #2, and similar to Phase #1, there was no difference in the proportion of eggs hatching between the intervention and non-intervention areas (Fig 3B, GLM  $z$  value: 0.511,  $\beta=0.3428$ , and  $p=0.609$ ). However, the number of wild adults collected in the intervention site was substantially less than in the non-intervention site in Phase #2 after releases started (Figs 3C and S1D, GLM: Site  $z$  value: -369.7,  $\beta=-1.29$ , and  $p<0.001$ , Month of Suppression Trial  $z$  value: -716.9,

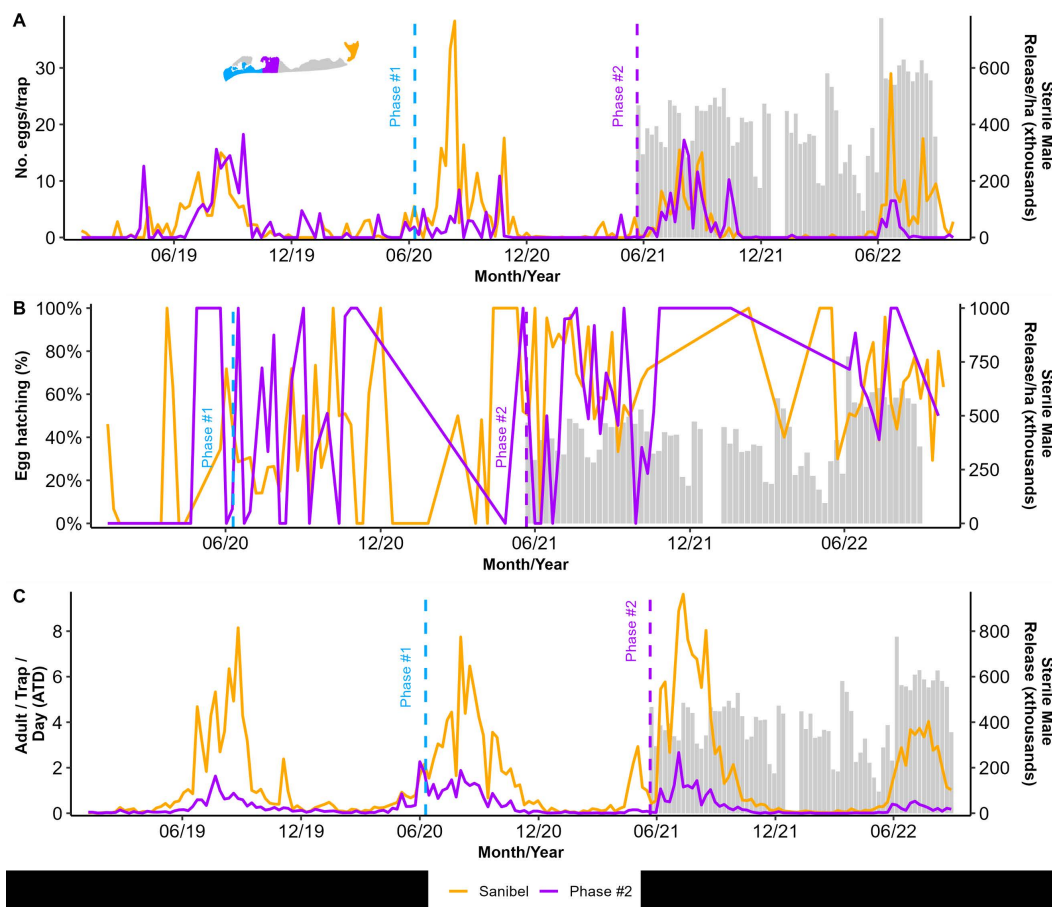

**Fig 3.** Captiva and Sanibel Islands sterile insect technique pilot (SIT) project field collection data showing the mean number of *Aedes aegypti* sterile marked males released per hectare twice a week (grey bars) and (A) the mean number of collected eggs during Phase #2 in Captiva and the non-intervention area in Sanibel Island, (B) the proportion of the collected eggs that hatched, and (C) the number of adults (males and females) found per trap per day (ATD). The dashed line indicates the start of each of the phases' releases.

<https://doi.org/10.1371/journal.pntd.0013256.g003>

$\beta = -0.058$ , and  $p < 0.001$ , Site  $\times$  Month  $z$  value:  $-182.1$ ,  $-0.044$ ,  $p < 0.001$ ). Our statistical approach of comparing monthly totals between our Phase #2 intervention site and our non-intervention site on Sanibel Island showed a detectable decrease in both numbers of eggs in ovitraps and, most importantly, adults captured in BGS traps (S1C and S1D Fig). However, analyzing these data with causal impact analysis comparing the multi-year population census data in our Phase #2 intervention site before and after the intervention showed no detectable effect of our intervention in Phase #2 (reduction in eggs  $-30\%$  but with a credible interval of  $-60\%$  to  $+47\%$ , the impact of  $-1.31$  but with a credible interval of  $-3.15$  to  $+0.65$ ,  $p = 0.094$ , estimates also show a reduction of  $-6\%$  in adults but with a credible interval of  $-36\%$  to  $+86\%$  an effect of  $-0.01$  with a credible interval of  $-0.16$  to  $+0.14$  and  $p = 0.463$ , S3 Fig).

The expansion to Phase #3 started on December 21, 2021, increasing our total area covered in sterile males to 142.2 ha (24.5 ha added) with the release of 7.1 million sterile males, and lasted 42 weeks until the study was interrupted on 26 September 2022, before Hurricane Ian hit the islands two days later. All activities ended (Fig 4A–4C). Over the partial season of sterile male releases, we found fewer eggs collected in ovitraps in our Phase #3 area on Captiva Island than in our non-intervention site on Sanibel Island (GLM: Site (Intervention vs. Non-Intervention)  $z$  value:  $-28.58$ ,  $\beta = -0.827$ , and  $p < 0.01$ , Month of Suppression Trial  $z$  value:  $-22.4$ ,  $\beta = -0.0241$ ,  $p < 0.001$ , S1E Fig), no effect on egg hatching (GLM: Site

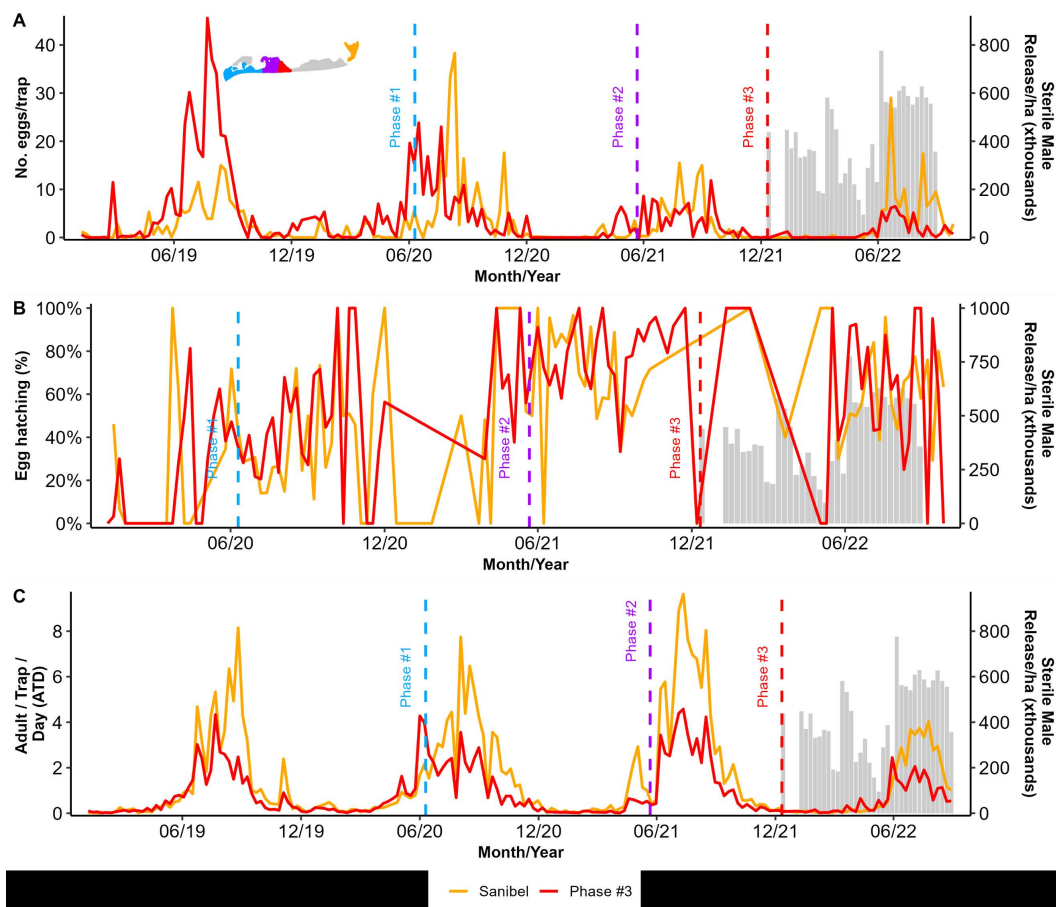

**Fig 4.** Captiva and Sanibel Islands sterile insect technique pilot (SIT) project field collection data showing the mean number of *Aedes aegypti* sterile marked males released per hectares twice a week (grey bars) and (A) the mean number of collected eggs during Phase #3 in Captiva and the non-intervention area in Sanibel Island, (B) the proportion of the collected eggs that hatched, and (C) the number of adults (males and females) found per trap per day (ATD). The dashed line indicates the start of each of the phases' releases.

<https://doi.org/10.1371/journal.pntd.0013256.g004>

z value: 1.579,  $\beta = 0.482$ , and  $p = 0.114$ ), and a small but detectable effect on adults collected in BGS traps (GLM: Site z value: -292.9,  $\beta = -0.64$ , and  $p < 0.001$ , Month of Suppression Trial z value: -716.9,  $\beta = -0.058$ , and  $p < 0.001$ , Site x Month z value: -2.84,  $\beta = -0.004$ ,  $p = 0.0045$ , [S1F Fig](#)). As for Phase #2 above, our statistical approach of comparing monthly totals between our Phase #3 intervention site and our non-intervention site on Sanibel Island showed a detectable decrease in both numbers of eggs in ovitraps and adults captured in BGS traps but with admittedly small effect sizes. Causal Impact Analysis (CIA) comparing our Phase #3 intervention site before and after the intervention showed no detectable effect of our intervention in Phase #3 (reduction in eggs of -32% but with a credible interval of -66% to +69%, effect of -1.32 but with a credible interval of -3.24 to +0.70,  $p = 0.09$ , estimates show a reduction of -19% in adults but with a credible interval of -45% to +26% an effect of -0.19 with a credible interval of -0.52 to +0.13 and  $p = 0.139$ , [S4 Fig](#)).

### Ratios of sterile to wild males

During the three phases of our suppression trial, we released more than 24.1 million sterile males on Captiva overall. From the total released, 0.02% of the adults were recaptured (10,587 marked sterile recaptured adults). We defined the sterile-to-wild male ratio as the number of recaptured marked sterile males collected for each wild male. Across the



release phases, the mean ratio typically ranged from 0.81 sterile:1 wild up to 13 sterile:1 wild, although it occasionally reached higher values (104.7 sterile:1 wild ratio). The ratio of sterile to wild males was relatively high during the dry season when wild populations are naturally low on Captiva [29]. The ratios of sterile to wild males were relatively low at times of the year when wild populations were high in the wet seasons of each year. Yet, we were able to drive population suppression in phase #1 despite these low sterile:wild ratios (Fig 5 and Table 2).

## Discussion

Our initial long-term goal for this project was to suppress *Ae. aegypti* across the entirety of Captiva Island. We were able to successfully suppress the population of *Ae. aegypti* in our Phase #1 field site on Captiva Island within a few months of beginning sterile male releases, and we maintained excellent control for a total of three mosquito active seasons before ending our program due to the catastrophic effects of Hurricane Ian (June 2020 - September 2022). Mosquito abundance on Captiva is highly seasonal, with very few adults captured during the dry season, typically from late October to early May, and populations proliferating rapidly and showing high activity levels during the rainy season, generally mid-May to early October [29,32]. Perhaps most importantly, we showed a dramatic decrease in adult mosquitoes in BGS traps in our Phase #1 release area over the first season of high mosquito activity with almost undetectable *Ae. aegypti* adult populations in

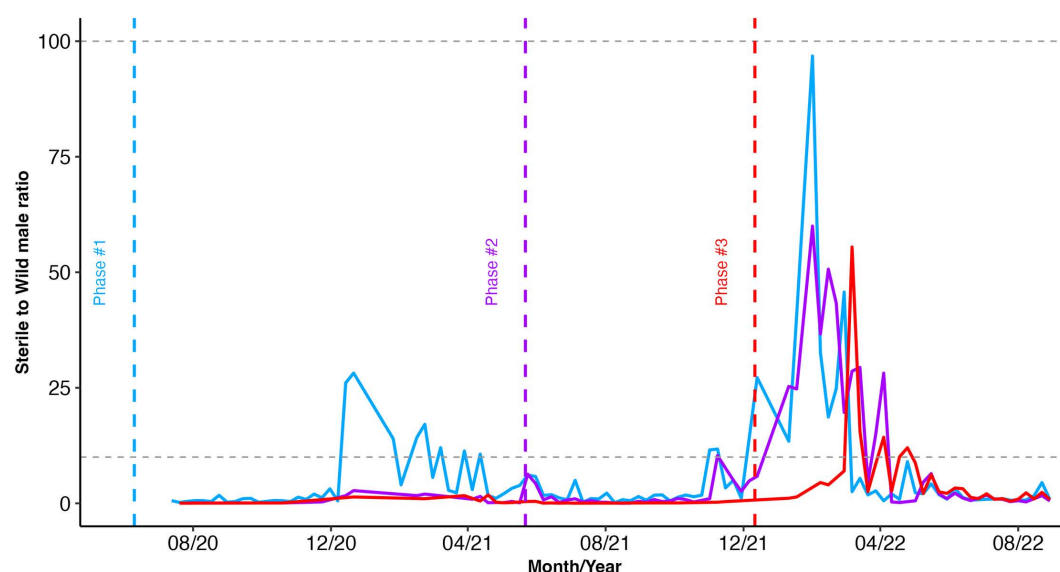

**Fig 5. Seasonal male ratio—the proportion of sterile males to one wild male recaptured from BGS traps between 2020 and 2021.** The horizontal grey dashed lines represent the literature-recommended interval for SIT to successfully suppress (i.e., between 10:1 and 100:1 sterile:wild males).

<https://doi.org/10.1371/journal.pntd.0013256.g005>

**Table 2. Seasonal mean sterile to wild male ratio and recapture – the proportion of sterile males to one wild male recaptured in BGS from 2020 to 2022, with the respective recapture rate.**

| Phase | Rain Season | Sterile to Wild Ratio | Sterile Males Recapture (%) |
|-------|-------------|-----------------------|-----------------------------|
| #1    | Low         | 9.01                  | 1 918 (0.050%)              |
|       | High        | 0.81                  | 1 435 (0.064%)              |
| #2    | Low         | 13.0                  | 2 175 (0.053%)              |
|       | High        | 1.43                  | 5 930 (0.109%)              |
| #3    | Low         | 12.3                  | 3 066 (0.165%)              |
|       | High        | 1.99                  | 6 277 (0.094%)              |

<https://doi.org/10.1371/journal.pntd.0013256.t002>

the second and third release seasons (Fig 2C). In the case of our Phase #1 area, we showed substantial declines in the numbers of wild mosquitoes captured in BGS traps both when comparing the intervention zone on Captiva to our non-intervention zone on nearby Sanibel Island and also by using causal impact analysis to leverage our three years of prior monitoring of these same traps [29]. Thus, monitoring mosquito populations in our core location for three years before beginning sterile male releases gave us excellent precision to show a significant suppression effect with high confidence. From a mosquito control perspective, by substantially decreasing the number of adults in traps, we expect that we effectively suppressed biting pressure from *Ae. aegypti* in our Phase #1 site on Captiva using sterile male releases.

Similarly to our successful suppression of adult numbers in our Phase #1 site, our sterile male releases decreased the number of eggs collected in ovitraps over the first season of releases. That suppression of the number of eggs collected from ovitraps was further maintained in the second and third seasons of field releases (Fig 2A). Despite our successes in reducing the number of eggs in ovitraps and the number of adults in BGS traps, we could not detect a reduction in the number of eggs hatching in our Phase #1 intervention site during our three-year trial. It is possible that the few females remaining in the Phase #1 intervention site were successfully mating with wild males rather than sterile males. However, we think it is most likely that the fertile eggs found in our Phase #1 intervention site were laid by females that had migrated into the Phase #1 area from the areas just south of our release zone where sterile male releases had not yet started, despite the buffering of our release areas for Phases #2 & #3. Phase #2 was 54.7 ha, and Phase #3 was 24.5 ha, but the linear distance between the edge of Phase #1 and Phase #2 was only 1.0 km, and Phase #3 was only 0.86 km. Although several reports show that *Ae. aegypti* adults are not particularly strong fliers [37–39], our own mark-release-recapture study on Captiva showed a mean traveled distance of around 201.7 m [30]. Thus, over several days, females could have dispersed from our non-intervention area into our Phase #1 intervention zone by combining flight and wind dispersal. Furthermore, human activities may also assist *Ae. aegypti* movement within Captiva, such as the flow of vehicular traffic from outside our release zone, because cars tend to move towards the high concentration of restaurants in our Phase #2 area of Captiva. Additionally, the resort area in Phase #1 had a shuttle that could have efficiently transported mosquitoes into and out of the suppression area as it ferried tourists between stops in the non-intervention zone and returned to the intervention zone. Although we did not find a significant reduction in egg hatching in our Phase #1 intervention area as has been found in some successful studies of SIT for *Ae. aegypti* or *Ae. albopictus* elsewhere in the world [40–43], we argue that our trial was successful in the most important parameters. Specifically, as some other programs with the resources to monitor adult traps as well as ovitraps have found for *Aedes* SIT [44–46], we showed a clear reduction in the number of females trapped in our Phase #1 intervention zone and we also showed a clear reduction in the numbers of eggs being laid in ovitraps.

Although the suppression was not as strong as in our Phase #1 area, in our Phase #2 area, we did observe a statistically detectable decrease in both the numbers of adult *Ae. aegypti* captured in BGS traps and the numbers of eggs collected in ovitraps (Figs 4A, 4C and S1). The reduction in unmarked, wild adults per BGS trap was apparent within the first season of releases in our Phase #2 area compared to our non-intervention area on Sanibel. Still, the reduction in the number of eggs per ovitrap was not apparent until releases continued into the second wet season with high adult numbers. We believe that our Phase #2 release area may have helped promote more effective suppression in our Phase #1 area by acting as a buffer zone, reducing the immigration of wild female adults into our Phase #1 zone. However, we did not detect any statistically detectable decrease in egg hatching in our Phase #2 zone, likely due to the immigration of wild females from areas of Captiva where releases were not occurring. Given that the total number of eggs in our Phase #2 intervention area was reduced substantially in the second season of releases, immigration of a relatively few fully fertile wild females into an intervention zone can provide enough fertile eggs to prevent any statistically detectable effect on the proportion of eggs hatched [47,48].

Our releases in Phase #3 began before the mosquito active season. But, we terminated this pilot project approximately 80% of the way through the active, wet season in late September 2022 due to the catastrophic landfall of Hurricane Ian

on Sanibel and Captiva Islands, as well as much of southwestern Florida. Hurricane Ian decimated homes, scoured away vegetation due to high winds and salt-water intrusion across the entire island from the storm surge, and destroyed the bridge that connected Sanibel and Captiva to the mainland. In addition to the landscape-level changes across the islands, the inability to easily travel to Sanibel and Captiva for several months when the bridge and roads washed away was the main factor causing us to terminate this pilot program earlier than expected. If our pilot trail had been on the mainland and more easily accessible, we may have chosen to resume SIT operations within weeks of the storm. This would have complemented the drastic increase in mosquito interventions that were conducted throughout the county. In the 30 days following Hurricane Ian, 183,032.4 ha were treated with aerial applications of adulticides and 72510.8 ha were treated with ground-based adulticide applications. However, the landscape-level changes combined with the long duration of reduced access to Sanibel and Captiva islands prompted us to end our pilot study. In fact, in 2023 LCMCD initiated a new SIT-based population suppression program in a mainland location and that work is ongoing. With respect to mosquito control responses to hurricanes and other natural disasters in general, if standing water is increased by the event then there is a possibility for increased biting pressures and, where applicable, disease transmission due to greater mosquito populations than before storm events [49,50]. We advocate for enhanced surveillance after storm events so mosquito population data can be used to inform decisions about whether additional control efforts such as increased pesticide applications or changes in the patterns of SIT releases should be implemented.

Similarly to our observations in our Phase #2 area, we observed a statistically detectable reduction in the number of adults caught in BGS traps within the release period in our Phase #3 area compared to our non-intervention zone on Sanibel Island (S1 Fig). However, we did not observe a detectable decrease in the number of eggs collected in ovitraps in our Phase #3 zone, likely due to the immigration of wild, fertile females from the areas south of our Phase #3 zone on Captiva where sterile-male releases had not yet begun. As mentioned above, we expect that our Phase #3 release area would act as a buffer zone for Phases #2 and #1 in summer 2022, facilitating the decrease in eggs laid in ovitraps in our Phase #2 zone in the active season when our Phase #3 releases were also occurring. Buffer zones, wherein sterile males are released in an area surrounding a core zone for interventional population suppression, have been used in several other studies of both radiation-sterilized male mosquitoes and *Wolbachia*-infected incompatible male mosquitoes and help increase the efficacy of suppression in the core intervention zone [51–54]. Furthermore, buffer zones for SIT interventions can consist of sterile males released in areas adjacent to a focal intervention area or other strategies for integrated mosquito management, such as larvicide or adulticide applications [41].

Despite achieving significant suppression of the *Ae. aegypti* population, our Phase #1 study operated with a notably low sterile:wild ratio. This outcome challenges the conventional recommendation ratio between 10:1 and 100:1. While the recommended sterile:wild ratio aims to ensure a high probability of sterile males mating with wild females, our findings indicate that lower ratios can still be effective under certain conditions. This insight could be valuable for future SIT programs, suggesting that with optimal release strategies and high-quality sterile males, population suppression can be achieved with fewer resources. Further research and analysis should focus on determining specific conditions and methods that could refine SIT guidelines and improve the efficiency of mosquito control efforts globally [55].

Many other authors have pointed out that SIT is not a stand-alone treatment [52,56]. Instead, it is crucial to conceive of SIT as one tool in the more extensive toolbox of integrated mosquito management. Most mosquito control organizations use relatively broad-spectrum chemical pesticides, either adulticides or larvicides, that can suppress multiple target species based on what species are most prevalent at any particular time of the year [57–59]. Thus, species-specific techniques like SIT should be reserved for control of challenging species, such as *Ae. aegypti*, that tend to be difficult to control with typical chemical applications. These difficulties lie with their choice of cryptic resting locations often protected from ultra-low volume adulticide sprays, the scattered nature of larval breeding sites that are frequently difficult to target with larvicidal treatments, and the evolution of resistance to common chemical pesticides [60,61]. SIT can be combined

with other mosquito-control tools to create one solid integrated mosquito management program. For example, beyond *Ae. aegypti*, the saltmarsh mosquito *Aedes taeniorhynchus* is a critical nuisance pest on Captiva and Sanibel Islands, as well as in other coastal areas in Florida, due to its emergence in large numbers, ability to disperse 10 km or more from breeding sites to feed, and aggressive evening biting that can be a significant disruption to outdoor recreation and tourism in oceanside towns in Florida [62]. During the course of this SIT population suppression study, LCMCD applied larvicides and adulticides to Sanibel and Captiva Islands as needed to suppress populations of pestiferous mosquitoes and to prevent or limit arboviral disease transmission. Because LCMCD is mandated by the state of Florida (FL Stat § 388.162 (2023)) to maintain and control mosquito populations for public health and quality of life, we could not withhold pesticide applications in the study areas. As a fully integrated mosquito management program, traditional mosquito suppression occurred alongside sterile male releases. Chemical treatments that were likely to impact populations of *Ae. aegypti* were recorded and are provided as supplementary information (S2 Table). Applications of larvicides that would not affect the larval habitats used by *Ae. aegypti* were not included in the table but took place in salt marsh and vegetated areas in and around the study areas.

Working as a part of an established and well-rounded mosquito control district following the best practices for integrated mosquito management allowed us to implement our sterile male releases better. The ability to schedule releases or treatments around each other provided a distinct advantage and, we believe, contributed to the overall success of the pilot study. In general, because sterile male releases occurred on a regular and scheduled basis, treatments with adulticide could be arranged to be conducted on different days than the preplanned releases of sterile males. Occasionally, we had to delay a release when urgent adulticiding was required. Still, due to prompt and clear communication between the surveillance and adulticiding departments in our district, sterile male release events rarely overlapped with adulticiding treatments. A further example of the integration of chemical control treatments with our SIT project occurred just before the beginning of releases. Due to the impacts of COVID-19, we could not begin releases when populations were seasonally lowest in spring 2020, as is generally advised [32]. However, using low-volume larvicide followed by adulticide treatments before releases in the active season allowed us to begin with lower populations when we began releases. Fully employing area-wide population suppression efforts allowed us to mitigate *Ae. aegypti*'s rising populations better when we started releasing sterile males in June 2020.

Conducting our own trapping and locally rearing mosquitoes in-house was also beneficial for our program. Adjusting the amounts of released males based on promptly collected field data allowed for responsive and prescriptive releases. Because mosquito production was local to the release area, males were not subjected to additional stressors that can be induced through shipment and prolonged transportation [35]. Having an independently operating SIT program with a dedicated staff allowed for a more robust program overall, consistently working to improve our methods and facilitating our scale-up over time, thus contributing to successful population suppression efforts with the SIT, including scaling up from pilot programs over relatively small areas like Captiva to increasing the use of SIT as a tool across needed locations across our district.

## Materials and methods

### Ethical committee

The creation, existence, and activities of the Mosquito Control Districts in Florida are regulated under the 2018 Florida Statutes, title XXIX (Public Health), Chapter 388 (Mosquito Control), in sections 171 and 181, which state the “Power to perform work” and the “Power to do all things necessary”, in which states “The respective districts of the state are hereby fully authorized to do and perform all things necessary to carry out the intent and purposes of this law”. With that, no further authorization was necessary to develop and apply mosquito trapping within the County. Permits were not required for the SIT releases. No human or vertebrate animal subjects were used in this work.



## Pilot site—Captiva and Sanibel Islands

Captiva and Sanibel Islands are in Lee County (Florida, USA—26.518028, -82.191057). Two other publications have already described the area: one describes the baseline data collection [29], and the second estimates the population parameters by mark-release-recapture studies [32]. Due in part to geographic isolation, the islands were known to have the presence of *Aedes aegypti* without the continuous presence of *Aedes albopictus*. Isolation of an area is an advantage for SIT pilot trials by limiting the migration of mosquitoes in and out of the selected areas.

Captiva has an area of more than 278 ha (Fig 1C), with 1,108 buildings. Of those buildings, only 188 units are continuously occupied, and 920 units are transiently occupied by visitors on holiday, such that the constant human population is ~320 year-round. However, from December through April, the island experiences high influxes of visitors at times more than tripling the number of residents on the island [63]. Because of Captiva's large, linearly arrayed land mass and initial development of sterile male production, our release strategy was planned to start with a defined area at the island's northern tip and increase the coverage in sequential sections over time. In this approach, we expanded the coverage area to encompass progressively more of Captiva Island as our capacity to rear more sterile males increased over time, which followed the suggestions of the phased conditional approach targeting full operational SIT implementation described previously in 2020 [34]. Similar strategies have been successfully applied for SIT programs and pilot trials for other insects [26]. Captiva Island had an intervention period from 10 June 2020 until 30 September 2022 that was divided into three phases (Fig 1D), according to the rearing capacity and expansion of the area of our releases.

## Trapping and monitoring

The surveillance network was described in depth in a previous publication describing the period before releases, also known as the baseline data collection period [29]. Surveillance began on June 22, 2017, and continued until September 22, 2022. Adult surveillance occurred using forty-eight BG-Sentinel 2 traps (BGS, Biogents, Regensburg, Germany) placed 200 m apart throughout Captiva, with the southernmost kilometer receiving three traps placed 300 m apart (see Fig 1C for trapping station locations). The northwesternmost neighborhood on Sanibel served as the control area, with ten traps placed 200 m apart. BGS traps were collected twice each week. Each surveillance site also had a corresponding oviposition trap consisting of a black plastic 437 ml cup with a tri-fold paper towel as the oviposition media to monitor egg levels (after egg sterility release). Ovitrap were maintained weekly by collecting the ovitrap paper, removing any remaining water, rinsing the cup with water, replacing the ovitrap paper, and refilling the cup with approximately 200 ml of water. Once releases began, ten additional oviposition traps were added to the release area and ten to the control area to intensify egg surveillance out of concern that oviposition might be missed.

Adult mosquitoes collected from the field were identified at the species level. Ovitrap papers collected were allowed to cure over a week in insectary conditions and then quantified for the number of hatched, viable-appearing, and collapsed eggs. Beginning August 13, 2019, through October 13, 2020, fifteen ovitrap papers were randomly selected. If eggs were present, these papers were flooded with 250 ml water, with hatched larvae reared to adults and identified to species. From October 20, 2020, through the end of the study, all ovitrap papers with eggs were evaluated using this process to better estimate the induced sterility in the field.

## Mosquito mass-rearing

A colony of *Ae. aegypti* was domesticated using eggs collected from the study areas in 2017, with the introduction of wild *Ae. aegypti* from these exact locations every ten generations as part of the colony management to maintain high-quality standards. Mosquitoes were reared and maintained at  $26.7 \pm 3^\circ\text{C}$  with  $80 \pm 2\%$  RH and a 14:10 L:D photoperiod. Adult colonies were provided with 10% sucrose *ad libitum*. Blood meals consisted of warmed, previously frozen pork blood (Manila's Ihawan, Oakridge, NJ, USA) in a 75 mm watchglass with parafilm membrane covering the top until May 2022

[57]. In May 2022, the blood was changed to defibrinated sheep blood (Hemostat Laboratories, Dixon, CA, USA), provided in the same apparatus. Eggs were hatched using a nutrient broth composed of 100 mg fish fry powder (AquaMax Fry Starter, Purina Animal Nutrition, Arden Hills, MN, USA) and 100 mg brewer's yeast in 500 ml water, which had been incubated for four hours [64]. Approximately 16 h after flooding the eggs, the larvae and hatch solution were transferred into mass-rearing racks (Wolbaki Biotech Corporation, Guangzhou, Guangdong Province, China). Larvae were reared at 2.3 larvae/ml density and fed a slurry of fish fry powder daily at increasing rates, as described in a previous publication [32]. Pupae were drained and separated using a glass plate separator (John W. Hock Company, Model 5412, Gainesville, FL, USA). After October 23, 2020, separations were made using a Wolbaki automated pupae sex sorter (Wolbaki Biotech Corporation, Guangzhou, Guangdong Province, China). Subsamples of pupae were visually inspected to ensure a female contamination rate of 0.2% or less.

### Irradiation

As described previously, male pupae were prepared for irradiation by drying them on paper in a food dehydrator to remove excess water [65]. Dried pupae were aliquoted into groups of 2200 individuals and placed in 3 x 8 cm polystyrene tissue culture plate lids (CELLTREAT Scientific Products, Ayer, MA, USA) modified with fiberglass screen in the center for irradiation. Pupae were irradiated at 42 Gy using an X-ray irradiator (RS-2400, Rad Source Technologies, Buford, GA, USA). The absorbed dose was measured using Gafchromic MD-V3 film dosimeters (1 x 1 cm) (Ashland, Covington, KY, USA, uncertainty below 2%), following the guideline from IPC-FAO/IAEA [60]. The films were read ~24 h after irradiation using a DoseReader 4 spectrophotometer (Radiation General Instrument Development and Production Ltd., Budapest, Hungary).

After irradiation, the aliquots of male pupae were placed in 2.37 L cylindrical plastic emergence containers prefilled with 200 ml of water. Lids, modified with a screen in the center, were placed on the containers. After emergence, adult males were provided 10% sucrose solution *ad libitum* until release. Once emergence was complete, the water was drained through a small slit cut in the side of the container and retained to assess mortality on any remaining pupae or failed emergence. Emergence containers were allowed to dry completely (~16 h) before marking.

### Marking and release strategy

**Sterile male marking.** Passive marking through emergence in fluorescent powder-conditioned-coated pots (Techno Glow, Ennis, TX, USA) was used from June 10, 2020, until July 8, 2020. Marking via insufflation was used from July 10, 2020, through the completion of releases on September 26, 2022. As of December 8, 2020, males were marked using DayGlo Eco pigments (DayGlo, Cleveland, OH, USA). Methods for both of these techniques can be found in more detail [32]. Marking methods changed to insufflation to reduce the amount of fluorescent powder used for mosquito marking, along with improved male quality and male survival as less excess powder reduced mortality.

**Marked males in Petri dishes.** Releases from June 10 to June 24, 2020, had pupae emerge in fluorescent powder-conditioned emergence pots, according to methods described previously [32]. These pots were chilled in a refrigerator at ~ one °C for ten minutes; then, males were dislodged and transferred to a Petri dish. A disk of paper towels was placed into the Petri dishes before the addition of mosquitoes to prevent condensation from causing them to stick to the Petri dish. Petri dishes were secured with a rubber band and put into a portable cooler (XtremePowerUS, model #94018, Chino, CA, USA) set at 11 °C. The cooler was transferred to a vehicle (van) and driven to the release area on Captiva (around 60 minutes). Once at a release site, one Petri dish was removed from the cooler, and the lid was removed. The dish was warmed by hand, and males were encouraged to disperse by gently tapping on the bottom of the Petri dish. After ~ 5 min, most sterile males had dispersed, and the Petri dish was placed onto a plastic plant saucer to allow any remaining live males to fly away. Vegetable oil was added around the Petri dish to deter ants and lizards from consuming

the remaining males. Dishes and saucers were collected in the same order set after all release points received males, overall taking ~3.5 hours from deploying the dish to retrieval. The remaining males were retained and assessed for mortality in the laboratory and our initial mortality with this method was ~11%.

**Marked males in emergence pots.** Beginning July 15, 2020, all sterile males were released directly from the emergence containers because this was faster overall than the dish release methods above, taking ~2.5 hours rather than ~3.5 hours. We also had less mortality with the new methods with an average mortality of ~5.8% in 2021 and ~5.2% in 2022. Release methods were consistent with those published previously [32].

**Releases.** Before the release of sterile males, all areas received an area-wide low-volume larvicide treatment of Vectobac WDG at 0.37 lb/acre on June 5, 2020. This was followed by an aerial ultra-low-volume Dibrom adulticide application on June 8, 2020. These treatments were applied to reduce *Ae. aegypti* populations in preparation for the SIT releases. Releases of sterile male *Ae. aegypti* began on June 10, 2020. It was noted in previous mark release recapture (MRR) studies that sterile males had a mean distance traveled of 201.7 m and an average life expectancy of ~2.46 days [32]. To ensure good spatial coverage of released sterile males, release points were set approximately 100 m apart.

Releases occurred twice per week, usually on Tuesdays and Fridays. Releases began at approximately 09:30 and continued until all had been released, around 13:00 (without interruptions or intervals). Approximately 100,000 sterile males/week were released initially. This amount increased as production capabilities improved over time, with over 350,000 sterile males/week towards the end of the study. Releases began at the northernmost point on Captiva and continued south throughout most of South Seas Island Resort, comprising around 15 release points. As male production increased, the release area was gradually expanded. The initial release area was ~63 ha and increased to 142.2 ha when releases concluded. Males who did not fly out of the release container were retained, and mortality was quantified when they returned to the laboratory. Applications of sterile males were initially distributed as evenly as possible. Once differences in wild mosquito activity began to be apparent and the number of mosquitoes produced in the laboratory supported it, particular release points (hotspots) would receive an increase in sterile males, often either double or triple the initial release amounts, based on field data from previous weeks.

## Statistical analysis

Statistical analyses were conducted using R within the RStudio environment [66,67]. The results of these analyses are provided as supplementary material (S1 Table and S1 Text). The relevant R packages and functions used are also included in the scripts in the code provided in the S1 Data. Generalized linear models (GLMs) were employed to evaluate male recapture parameters, such as recapture percentage and the number of recaptured males and females, egg analysis, and hatch rate. A binomial distribution was used for percentages, while a Poisson distribution was applied for counts. The Causal Impact Analysis (CIA) was used from the R package [35,36] as the interrupted time-series analysis to determine whether releases impacted the wild population.

## Supporting information

**S1 Fig. Contrasts of the numbers of eggs collected in ovitraps and the numbers of wild adults caught in BGS taps (Emmeans obtained from a zero-inflated GLM analysis) comparing the intervention and non-intervention areas considering the beginning of the releases in each phase (1, 2, and 3) for egg density (A, C, and E) and adult density (B, D, and F). Each contrast was corrected for multiple comparisons and sampling times when the intervention and non-intervention areas were significantly different are marked with a \*, whereas times when the intervention and non-intervention areas were not significantly different are marked with “ns”. (TIF)**

**S2 Fig.** Visualizations of our causal impact effect analysis of Phase #1 of sterile male releases, with comparisons of the observed data (A, B – blue lines represent the intervention area and yellow the non-intervention area), how the observed data after the releases deviated from what was expected before releases at each time period in the intervention area showing a clear decrease in the expected numbers of eggs and mosquitoes trapped after the intervention during the mosquito active season (C, D), followed by the cumulative causal effects for the egg density and the adult density in the intervention area (E, F).

(TIF)

**S3 Fig.** Visualizations of our causal impact effect analysis of Phase #2 of sterile male releases, with comparisons of the observed data (A, B – purple lines represent the intervention area and yellow the non-intervention area), how the observed data after the releases deviated from what was expected before releases at each time period in the intervention area showing no detectable decrease in the expected numbers of eggs and mosquitoes trapped after the intervention during the mosquito active season (C, D), followed by the cumulative causal effects for the egg density and the adult density in the intervention area showing no clear effect (E, F).

(TIF)

**S4 Fig.** Visualizations of our causal impact effect analysis of Phase #3 of sterile male releases, with comparisons of the observed data (A, B – red lines represent the intervention area and yellow the non-intervention area), how the observed data after the releases deviated from what was expected before releases at each time period in the intervention area showing a small decrease in the expected numbers of eggs and mosquitoes trapped after the intervention during the mosquito active season (C, D), followed by the cumulative causal effects for the egg density and the adult density in the intervention area showing a small, but not statistically detectable decrease (E, F).

(TIF)

**S1 Text.** Statistical analysis output from the Causal Impact Analysis (CIA).

(TXT)

**S1 Table.** Statistical analysis output from the zero-inflated model with the Emmeans contrasts included.

(XLSX)

**S2 Table.** Data on insecticide applications during the release periods on Captiva and Sanibel Islands.

(XLSX)

**S1 Data.** Scripts for analyses in R.

(R)

**S2 Data.** Data used throughout the manuscript, consisting of sterile male release data, BG trap capture data, and ovitrap data.

(XLSX)

## Acknowledgments

We thank LCMCD technicians for their support in trapping, processing, and recording data.

## Author contributions

**Conceptualization:** Rachel Morreale, Danilo O. Carvalho, Rui Pereira, David F. Hoel.

**Data curation:** Rachel Morreale, Danilo O. Carvalho, Steven Stenhouse, Johanna Bajonero.

**Formal analysis:** Rachel Morreale, Danilo O. Carvalho, Daniel A. Hahn.



**Funding acquisition:** Rachel Morreale, Aaron Lloyd, David F. Hoel.

**Investigation:** Rachel Morreale, Danilo O. Carvalho, Steven Stenhouse, Johanna Bajonero.

**Methodology:** Rachel Morreale, Danilo O. Carvalho.

**Project administration:** Rachel Morreale, Aaron Lloyd, David F. Hoel.

**Resources:** Rachel Morreale, Steven Stenhouse.

**Software:** Danilo O. Carvalho.

**Supervision:** Rachel Morreale, Rui Pereira, Aaron Lloyd, David F. Hoel.

**Validation:** Rachel Morreale.

**Visualization:** Danilo O. Carvalho, Daniel A. Hahn.

**Writing – original draft:** Rachel Morreale, Danilo O. Carvalho, Daniel A. Hahn.

**Writing – review & editing:** Danilo O. Carvalho, Johanna Bajonero, Rui Pereira, Daniel A. Hahn, Aaron Lloyd, David F. Hoel.

## References

1. Lambrechts L, Failloux A-B. Vector biology prospects in dengue research. *Mem Inst Oswaldo Cruz*. 2012;107(8):1080–2. <https://doi.org/10.1590/s0074-02762012000800022> PMID: [23295765](#)
2. Christophers SR. *Aedes aegypti* (L.) the yellow fever mosquito: its life history, bionomics and structure. Cambridge: Cambridge University Press; 1960.
3. Lwande OW, Obanda V, Lindström A, Ahlm C, Evander M, Näslund J, et al. Globe-Trotting *Aedes aegypti* and *Aedes albopictus*: Risk Factors for Arbovirus Pandemics. *Vector Borne Zoonotic Dis*. 2020;20(2):71–81. <https://doi.org/10.1089/vbz.2019.2486> PMID: [31556813](#)
4. Cebrán-Camisón S, Martínez-de la Puente J, Figuerola J. A Literature Review of Host Feeding Patterns of Invasive Aedes Mosquitoes in Europe. *Insects*. 2020;11(12):848. <https://doi.org/10.3390/insects11120848> PMID: [33260438](#)
5. Wilke ABB, Benelli G, Beier JC. Anthropogenic changes and associated impacts on vector-borne diseases. *Trends Parasitol*. 2021;37(12):1027–30. <https://doi.org/10.1016/j.pt.2021.09.013> PMID: [34686421](#)
6. Gomes A de C, de Souza JMP, Bergamaschi DP, Dos Santos JLF, Andrade VR, Leite OF, et al. Anthropophilic activity of *Aedes aegypti* and of *Aedes albopictus* in area under control and surveillance. *Rev Saude Publica*. 2005;39(2):206–10. <https://doi.org/10.1590/s0034-89102005000200010> PMID: [15895139](#)
7. Soghigian J, Gloria-Soria A, Robert V, Le Goff G, Failloux A-B, Powell JR. Genetic evidence for the origin of *Aedes aegypti*, the yellow fever mosquito, in the southwestern Indian Ocean. *Mol Ecol*. 2020;29(19):3593–606. <https://doi.org/10.1111/mec.15590> PMID: [33463828](#)
8. Powell JR, Gloria-Soria A, Kotsakiozi P. Recent History of *Aedes aegypti*: Vector Genomics and Epidemiology Records. *Bioscience*. 2018;68(11):854–60. <https://doi.org/10.1093/biosci/biy119> PMID: [30464351](#)
9. Soper FL. *Aedes aegypti* and yellow fever. *Bull World Health Organ*. 1967;36(4):521–7. PMID: [5299444](#)
10. Nogueira P. The early history of yellow fever. 2009.
11. Duffy J. Yellow fever in the continental United States during the nineteenth century. *Bull N Y Acad Med*. 1968;44(6):687–701. PMID: [4870696](#)
12. Patterson GM. The mosquito wars: a history of mosquito control in Florida. Gainesville: University Press of Florida; 2004.
13. Stephenson C, Coker E, Wisely S, Liang S, Dinglasan RR, Lednický JA. Imported Dengue Case Numbers and Local Climatic Patterns Are Associated with Dengue Virus Transmission in Florida, USA. *Insects*. 2022;13(2):163. <https://doi.org/10.3390/insects13020163> PMID: [35206736](#)
14. Mohammed HP, Ramos MM, Rivera A, Johansson M, Muñoz-Jordan JL, Sun W, et al. Travel-associated dengue infections in the United States, 1996 to 2005. *J Travel Med*. 2010;17(1):8–14. <https://doi.org/10.1111/j.1708-8305.2009.00374.x> PMID: [20074096](#)
15. Rivera A, Adams LE, Sharp TM, Lehman JA, Waterman SH, Paz-Bailey G. Travel-Associated and Locally Acquired Dengue Cases - United States, 2010–2017. *MMWR Morb Mortal Wkly Rep*. 2020;69(6):149–54. <https://doi.org/10.15585/mmwr.mm6906a1> PMID: [32053577](#)
16. Chen J, Beier JC, Cantrell RS, Cosner C, Fuller DO, Guan Y, et al. Modeling the importation and local transmission of vector-borne diseases in Florida: The case of Zika outbreak in 2016. *J Theor Biol*. 2018;455:342–56. <https://doi.org/10.1016/j.jtbi.2018.07.026> PMID: [30053386](#)
17. Chang C, Ortiz K, Ansari A, Gershwin ME. The Zika outbreak of the 21st century. *J Autoimmun*. 2016;68:1–13. <https://doi.org/10.1016/j.jaut.2016.02.006> PMID: [26925496](#)
18. Cullen KA. Malaria surveillance—United States, 2013. *MMWR Surveillance Summaries*. 2016;65. Available from: <https://www.cdc.gov/mmwr/volumes/65/ss/ss6502a1.htm>

19. Bagcchi S. Locally acquired malaria cases in the USA. *Lancet Infect Dis*. 2023;23(10):e401. [https://doi.org/10.1016/S1473-3099\(23\)00581-9](https://doi.org/10.1016/S1473-3099(23)00581-9) PMID: [37776883](#)
20. Huang Z, Tatem AJ. Global malaria connectivity through air travel. *Malar J*. 2013;12:269. <https://doi.org/10.1186/1475-2875-12-269> PMID: [23914776](#)
21. Guedes RNC, Beins K, Navarro Costa D, Coelho GE, Bezerra HS da S. Patterns of insecticide resistance in *Aedes aegypti*: meta-analyses of surveys in Latin America and the Caribbean. *Pest Manag Sci*. 2020;76(6):2144–57. <https://doi.org/10.1002/ps.5752> PMID: [31957156](#)
22. Wang Y, Wang X, Brown DJ, An M, Xue R-D, Liu N. Insecticide resistance: Status and potential mechanisms in *Aedes aegypti*. *Pestic Biochem Physiol*. 2023;195:105577. <https://doi.org/10.1016/j.pestbp.2023.105577> PMID: [37666603](#)
23. Lucas KJ, Bales RB. Insecticide resistance evaluation of *Aedes aegypti* mosquitoes from Collier County, Florida. *Arthropod Management Tests*. 2022;47:tsac120.
24. Garcia G de A, David MR, Martins A de J, Maciel-de-Freitas R, Linss JGB, Araújo SC, et al. The impact of insecticide applications on the dynamics of resistance: The case of four *Aedes aegypti* populations from different Brazilian regions. *PLoS Negl Trop Dis*. 2018;12(2):e0006227. <https://doi.org/10.1371/journal.pntd.0006227> PMID: [29432488](#)
25. Achee NL, Grieco JP, Vatandoost H, Seixas G, Pinto J, Ching-Ng L, et al. Alternative strategies for mosquito-borne arbovirus control. *PLoS Negl Trop Dis*. 2019;13(1):e0006822. <https://doi.org/10.1371/journal.pntd.0006822> PMID: [30605475](#)
26. Hendrichs J, Vreysen MJB, Enkerlin WR, Cayol JP. Strategic options in using sterile insects for area-wide integrated pest management. In: *Sterile Insect Technique*. CRC Press; 2021. p. 841–84.
27. Bouyer J. Current status of the sterile insect technique for the suppression of mosquito populations on a global scale. *Infect Dis Poverty*. 2024;13(1):68. <https://doi.org/10.1186/s40249-024-01242-z> PMID: [39327622](#)
28. Dyck VA, Hendrichs J, Robinson AS. Sterile insect technique: principles and practice in area-wide integrated pest management. 2021.
29. Morreale R, Stenhouse S, Carvalho DO, Hahn DA, Bourtzis K, Lloyd A, et al. Seasonal insights for integrative mosquito management from multi-year baseline entomological data on *Aedes aegypti* in Lee County, Florida. *PLoS One*. 2024;19(10):e0311407. <https://doi.org/10.1371/journal.pone.0311407> PMID: [39392849](#)
30. Baumhover AH, Graham AJ, Bitter BA, Hopkins DE, New WD, Dudley FH, et al. Screw-Worm Control Through Release of Sterilized Flies. *J Econ Entomol*. 1955;48(4):462–6. <https://doi.org/10.1093/jee/48.4.462>
31. Bushland RC. Screwworm Research and Eradication. *Bull Entomol Soc Am*. 1975;21(1):23–6. <https://doi.org/10.1093/besa/21.1.23>
32. Carvalho DO, Morreale R, Stenhouse S, Hahn DA, Gomez M, Lloyd A, et al. A sterile insect technique pilot trial on Captiva Island: defining mosquito population parameters for sterile male releases using mark-release-recapture. *Parasit Vectors*. 2022;15(1):402. <https://doi.org/10.1186/s13071-022-05512-3> PMID: [36320036](#)
33. Tur C, Almenar D, Benlloch-Navarro S, Argilés-Herrero R, Zacarés M, Dalmau V, et al. Sterile Insect Technique in an Integrated Vector Management Program against Tiger Mosquito *Aedes albopictus* in the Valencia Region (Spain): Operating Procedures and Quality Control Parameters. *Insects*. 2021;12(3):272. <https://doi.org/10.3390/insects12030272> PMID: [33807092](#)
34. Bouyer J, Yamada H, Pereira R, Bourtzis K, Vreysen MJB. Phased Conditional Approach for Mosquito Management Using Sterile Insect Technique. *Trends Parasitol*. 2020;36(4):325–36. <https://doi.org/10.1016/j.pt.2020.01.004> PMID: [32035818](#)
35. Brodersen KH, Gallusser F, Koehler J, Remy N, Scott SL. Inferring causal impact using Bayesian structural time-series models. *Ann Appl Stat*. 2015;9(1). <https://doi.org/10.1214/14-aos788>
36. Brodersen KH, Hauser A, Hauser MA. Package Causal Impact. Mountain View, CA, USA: Google LLC; 2017 [cited 3 Aug 2024]. Available from: <https://mirror.las.iastate.edu/CRAN/web/packages/CausalImpact/CausalImpact.pdf>
37. Harrington LC, Scott TW, Lerdthusanee K, Coleman RC, Costero A, Clark GG, et al. Dispersal of the dengue vector *Aedes aegypti* within and between rural communities. *Am J Trop Med Hyg*. 2005;72(2):209–20. <https://doi.org/10.4269/ajtmh.2005.72.209> PMID: [15741559](#)
38. Reiter P, Amador MA, Anderson RA, Clark GG. Short report: dispersal of *Aedes aegypti* in an urban area after blood feeding as demonstrated by rubidium-marked eggs. *Am J Trop Med Hyg*. 1995;52(2):177–9. <https://doi.org/10.4269/ajtmh.1995.52.177> PMID: [7872449](#)
39. Moore TC, Brown HE. Estimating *Aedes aegypti* (Diptera: Culicidae) Flight Distance: Meta-Data Analysis. *J Med Entomol*. 2022;59(4):1164–70. <https://doi.org/10.1093/jme/tjac070> PMID: [35640992](#)
40. Bellini R, Carrieri M, Balestrino F, Puggioli A, Malfacini M, Bouyer J. Field Competitiveness of *Aedes albopictus* (Diptera: Culicidae) Irradiated Males in Pilot Sterile Insect Technique Trials in Northern Italy. *J Med Entomol*. 2021;58(2):807–13. <https://doi.org/10.1093/jme/tjaa235> PMID: [33179753](#)
41. Becker N, Langentepe-Kong SM, Tokatlian Rodriguez A, Oo TT, Reichle D, Lühken R, et al. Integrated control of *Aedes albopictus* in Southwest Germany supported by the Sterile Insect Technique. *Parasit Vectors*. 2022;15(1):9. <https://doi.org/10.1186/s13071-021-05112-7> PMID: [34983608](#)
42. Gato R, Menéndez Z, Prieto E, Argilés R, Rodríguez M, Baldoquín W, et al. Sterile Insect Technique: Successful Suppression of an *Aedes aegypti* Field Population in Cuba. *Insects*. 2021;12(5):469. <https://doi.org/10.3390/insects12050469> PMID: [34070177](#)
43. Balatsos G, Puggioli A, Karras V, Lytra I, Mastronikolos G, Carrieri M, et al. Reduction in Egg Fertility of *Aedes albopictus* Mosquitoes in Greece Following Releases of Imported Sterile Males. *Insects*. 2021;12(2):110. <https://doi.org/10.3390/insects12020110> PMID: [33513716](#)
44. Bansal S, Lim JT, Chong C-S, Dickens B, Ng Y, Deng L, et al. Effectiveness of Wolbachia-mediated sterility coupled with sterile insect technique to suppress adult *Aedes aegypti* populations in Singapore: a synthetic control study. *Lancet Planet Health*. 2024;8(9):e617–28. [https://doi.org/10.1016/S2542-5196\(24\)00169-4](https://doi.org/10.1016/S2542-5196(24)00169-4) PMID: [39243778](#)

45. Tur C, Almenar D, Zacarés M, Benlloch-Navarro S, Pla I, Dalmau V. Suppression Trial through an Integrated Vector Management of *Aedes albopictus* (Skuse) Based on the Sterile Insect Technique in a Non-Isolated Area in Spain. *Insects*. 2023;14(8):688. <https://doi.org/10.3390/insects14080688> PMID: 37623398
46. Zheng X, Zhang D, Li Y, Yang C, Wu Y, Liang X, et al. Incompatible and sterile insect techniques combined eliminate mosquitoes. *Nature*. 2019;572(7767):56–61. <https://doi.org/10.1038/s41586-019-1407-9> PMID: 31316207
47. Kittayapong P, Ninphanomchai S, Limohpasmanee W, Chansang C, Chansang U, Mongkalagoon P. Combined sterile insect technique and incompatible insect technique: The first proof-of-concept to suppress *Aedes aegypti* vector populations in semi-rural settings in Thailand. *PLoS Negl Trop Dis*. 2019;13(10):e0007771. <https://doi.org/10.1371/journal.pntd.0007771> PMID: 31658265
48. Giménez JO, Fischer S, Zalazar L, Stein M. Cold Season Mortality Under Natural Conditions and Subsequent Hatching Response of *Aedes* (*Stegomyia*) *aegypti* (Diptera: Culicidae) Eggs in a Subtropical City of Argentina. *J Med Entomol*. 2015;52(5):879–85. <https://doi.org/10.1093/jme/tjv107> PMID: 26336247
49. Connelly CR, Borchert J. Mosquito control emergency preparedness and response to natural disasters. *J Am Mosq Control Assoc*. 2020;36(2 Suppl):2–4. <https://doi.org/10.2987/8756-971X-36.2S.2> PMID: 33575685
50. Moise IK, Huang Q, Mutebi J-P, Petrie WD. Effects of Hurricane Irma on mosquito abundance and species composition in a metropolitan Gulf coastal city, 2016–2018. *Sci Rep*. 2024;14(1):21886. <https://doi.org/10.1038/s41598-024-72734-z> PMID: 39300158
51. Oliva CF, Benedict MQ, Collins CM, Baldet T, Bellini R, Bossin H, et al. Sterile Insect Technique (SIT) against *Aedes* Species Mosquitoes: A Roadmap and Good Practice Framework for Designing, Implementing and Evaluating Pilot Field Trials. *Insects*. 2021;12(3):191. <https://doi.org/10.3390/insects12030191> PMID: 33668374
52. Dame DA, Curtis CF, Benedict MQ, Robinson AS, Knols BGJ. Historical applications of induced sterilisation in field populations of mosquitoes. *Malar J*. 2009;8 Suppl 2(Suppl 2):S2. <https://doi.org/10.1186/1475-2875-8-S2-S2> PMID: 19917072
53. Mains JW, Kelly PH, Dobson KL, Petrie WD, Dobson SL. Localized Control of *Aedes aegypti* (Diptera: Culicidae) in Miami, FL, via Inundative Releases of Wolbachia-Infected Male Mosquitoes. *J Med Entomol*. 2019;56(5):1296–303. <https://doi.org/10.1093/jme/tjz051> PMID: 31008514
54. Crawford JE, Clarke DW, Criswell V, Desnoyer M, Cornel D, Deegan B, et al. Efficient production of male Wolbachia-infected *Aedes aegypti* mosquitoes enables large-scale suppression of wild populations. *Nat Biotechnol*. 2020;38(4):482–92. <https://doi.org/10.1038/s41587-020-0471-x> PMID: 32265562
55. Dobson SL. When More is Less: Mosquito Population Suppression Using Sterile, Incompatible and Genetically Modified Male Mosquitoes. *J Med Entomol*. 2021;58(5):1980–6. <https://doi.org/10.1093/jme/tjab025> PMID: 33704487
56. Bourtzis K, Lees RS, Hendrichs J, Vreysen MJB. More than one rabbit out of the hat: Radiation, transgenic and symbiont-based approaches for sustainable management of mosquito and tsetse fly populations. *Acta Trop*. 2016;157:115–30. <https://doi.org/10.1016/j.actatropica.2016.01.009> PMID: 26774684
57. Lloyd AM, Connelly CR, Carlson DB. Florida mosquito control: the state of the mission as defined by mosquito controllers, regulators, and environmental managers. Vero Beach, FL: Florida Coordinating Council on Mosquito Control, University of Florida, Institute of Food and Agricultural Sciences, Florida Medical Entomology Laboratory; 2018.
58. Foley EW, Morreale RL, Hoel DF, Lloyd AM. Area-wide mosquito management in Lee County, Florida, USA. In: Area-Wide Integrated Pest Management. CRC Press; 2021. p. 319–38.
59. McGregor BL, Connelly CR. A Review of the Control of *Aedes aegypti* (Diptera: Culicidae) in the Continental United States. *J Med Entomol*. 2021;58(1):10–25. <https://doi.org/10.1093/jme/tjaa157> PMID: 32829398
60. Scott ML, Hribar LJ, Leal AL, McAllister JC. Characterization of Pyrethroid Resistance Mechanisms in *Aedes aegypti* from the Florida Keys. *Am J Trop Med Hyg*. 2021;104(3):1111–22. <https://doi.org/10.4269/ajtmh.19-0602> PMID: 33432904
61. Schluep SM, Buckner EA. Metabolic Resistance in Permethrin-Resistant Florida *Aedes aegypti* (Diptera: Culicidae). *Insects*. 2021;12(10):866. <https://doi.org/10.3390/insects12100866> PMID: 34680634
62. Kondapaneni R, Malcolm AN, Vazquez BM, Zeng E, Chen T-Y, Kosinski KJ, et al. Mosquito Control Priorities in Florida—Survey Results from Florida Mosquito Control Districts. *Pathogens*. 2021;10(8):947. <https://doi.org/10.3390/pathogens10080947> PMID: 34451411
63. USA. Captiva CDP, Florida - Census Bureau Profile. 5 Aug 2022 [cited 5 Aug 2022]. Available from: <https://data.census.gov/cedsci/profile?q=1600000US1210425>
64. Zheng M-L, Zhang D-J, Damiens DD, Yamada H, Gilles JRL. Standard operating procedures for standardized mass rearing of the dengue and chikungunya vectors *Aedes aegypti* and *Aedes albopictus* (Diptera: Culicidae) - I - egg quantification. *Parasit Vectors*. 2015;8:42. <https://doi.org/10.1186/s13071-014-0631-2> PMID: 25614052
65. Tussey DA, Morreale R, Carvalho DO, Stenhouse S, Lloyd AM, Hoel DF, et al. Developing methods for chilling, compacting, and sterilizing adult *Aedes aegypti* (Diptera: Culicidae) and comparing mating competitiveness between males sterilized as adults versus pupae for sterile male release. *J Med Entomol*. 2023;60(5):1038–47. <https://doi.org/10.1093/jme/tjad079> PMID: 37341187
66. R Core Team. R: A language and environment for statistical computing. R Foundation for Statistical Computing; 2024. Available from: <https://www.R-project.org/>
67. RStudio Team. RStudio: Integrated Development Environment for R. Boston, MA USA: RStudio, PBC; 2021. Available from: <http://www.rstudio.com/>
